# Supplementary material for: Solvation structure fine-tuning enables high stability sodium metal batteries
Source: Royal Society of Chemistry journal article supplement (doi:10.1039/d4ta04755a), 2024-01-01
Supplement: d4ta04755a1.pdf [file d4ta04755a1.pdf]

## Supporting Information

### Solvation Structure Fine-Tuning Enables High Stability Sodium

#### Metal Batteries

Xiaotong Gao<sup>a</sup>, Jiyuan You<sup>a</sup>, Liwei Deng<sup>a</sup>, Bo Zhang<sup>a</sup>, Yuqian Li<sup>a\*</sup>, Wenju Wang<sup>a†</sup>

<sup>a</sup> *School of Energy and Power Engineering, Nanjing University of Science and Technology, Nanjing, 210094*

**Keywords:** Sodium metal batteries, Solvation shell structure, Sodium dendrites, Solid electrolyte interface films, Coulombic efficiency

---

\* Corresponding author. E-mail address: liyuqian@njust.edu.cn

† Corresponding author. E-mail address: wangwenju@njust.edu.cn

## **1. Experimental Section**

### **1.1 Raw materials**

Na metal stored in kerosene was purchased from Sigma-Aldrich. Ethylene carbonate (EC), Diethyl carbonate (DEC), fluoroethylene carbonate (FEC), and hexafluorophosphate ( $\text{NaPF}_6$ ) were purchased from DoDo Chem (China). Other chemical reagents were provided by Sinopharm Chemical Reagent Co. Ltd.

### **1.2 Electrolyte preparation**

1 M  $\text{NaPF}_6$  was dissolved in EC, DEC, and FEC (1:1:0.05, in volume ratio, EDF) solvent, and EC, DEC, FEC, and PMS (1:1:0.05:0.03, in volume ratio, EDF/PMS) solvent. All electrolytes were prepared inside a glovebox with  $\text{O}_2$  and  $\text{H}_2\text{O}$  content  $\leq$  0.05 ppm (Vigor, China).

### **1.3 General Characterization**

The morphologies and microstructures of sodium metal surface were characterized by using a field emission scanning electron microscope (FESEM, Hitachi S4800) and energy dispersive X-ray spectroscopy (EDS). X-ray photoelectron spectroscopy (XPS) was operated by using an ESCALAB\_250Xi X-ray photoelectron spectrometer. To avoid direct contact with air, all samples containing Na metal were all transferred in a homemade device filled with pure Ar.

### **1.4 Electrochemical Measurement**

All cells (CR20332 type) were assembled in a glovebox filled with Ar, which  $\text{O}_2$  and  $\text{H}_2\text{O}$  content  $\leq$  0.05ppm. The LSV (2.5 to 6.0 V with Na/steel cells at 0.5  $\text{mV s}^{-1}$ ) measurements were carried out in an electrochemical workstation (DH7000, DONGHUA, China).

### **1.5 Preparation of Full cells and Symmetric cells**

$\text{Na}_3\text{V}_2(\text{PO}_4)_3$  (NVP) was synthesized according to the literature [1]. The NVP cathode electrodes used for full cells were fabricated by maxing NVP, super P, and PVDF binder at a mass ratio of 7:2:1 on Al foil ( $\sim 1.14 \text{ mg cm}^{-2}$ ). Na anode electrode was made from purchased sodium blocks pressed into 15.9 mm sodium sheets. The Na/NVP full cells were cycled between 2.6-3.8V (1C was defined as 117  $\text{mA g}^{-1}$ ).

## 2. Supplementary data

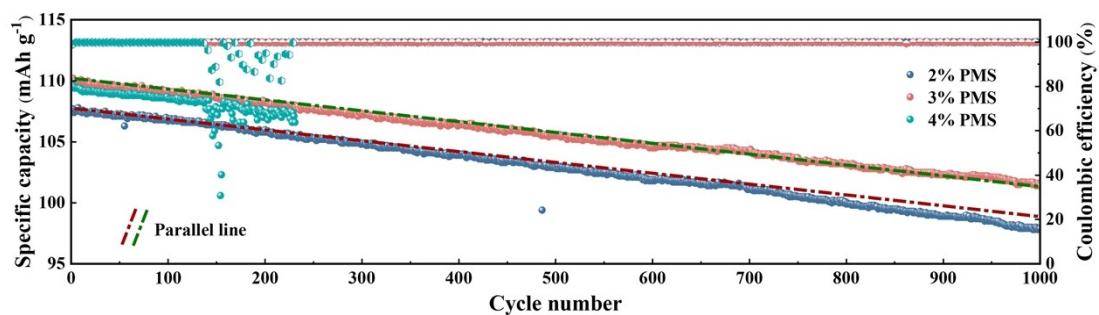

**Fig. S1.** Cyclability with different electrolytes additive concentrations of Na||NVP full cells at 2C.

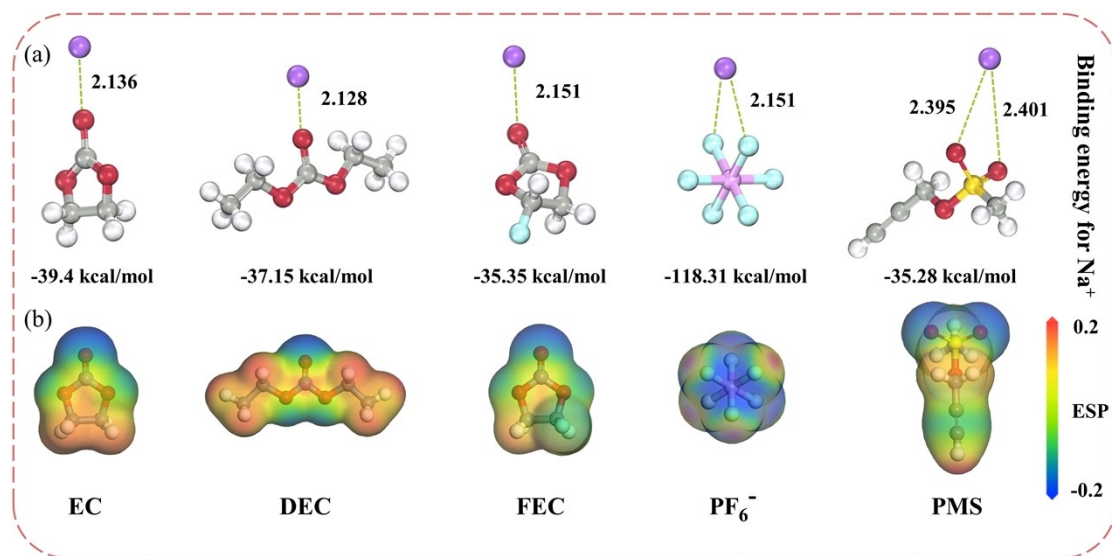

**Fig. S2.** (a) Adsorption energies and bond length of Na<sup>+</sup> with solvent molecules and anions. (b) Electrostatic potential map (ESP) of solvent molecules and anions.

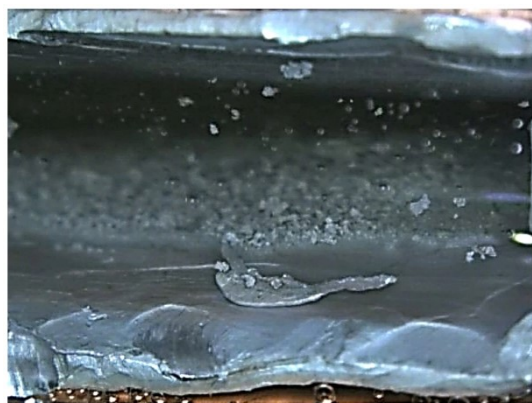

**Fig. S3.** Schematic of the electrochemical deposition of EDF electrolyte at 100th second in 50 mA cm<sup>-2</sup>.

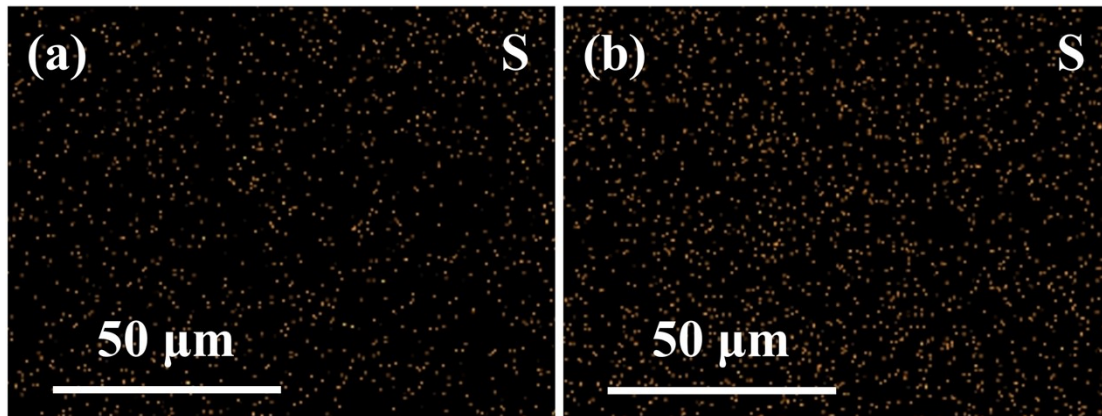

Fig. S4. Enlarged mapping image of S element on (a) EDF-80r and (b) EDF/PMS-80r SEI films.

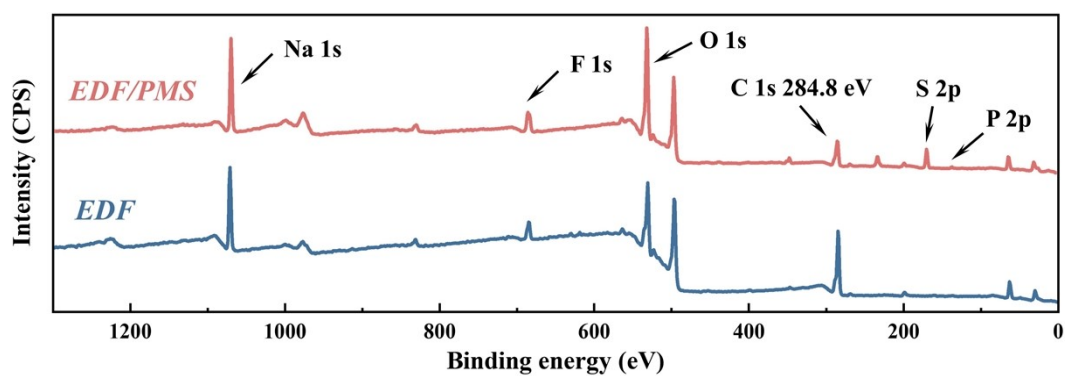

Fig. S5. XPS full spectrum of SEI films in EDF and EDF/PMS electrolytes.

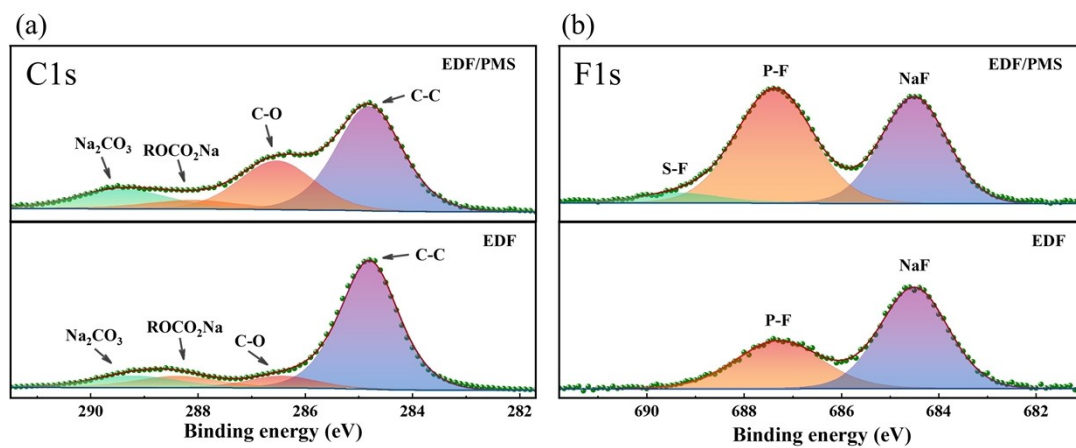

Fig. S6. (a) C 1s and (b) F 1s peaks of EDF and EDF/PMS.

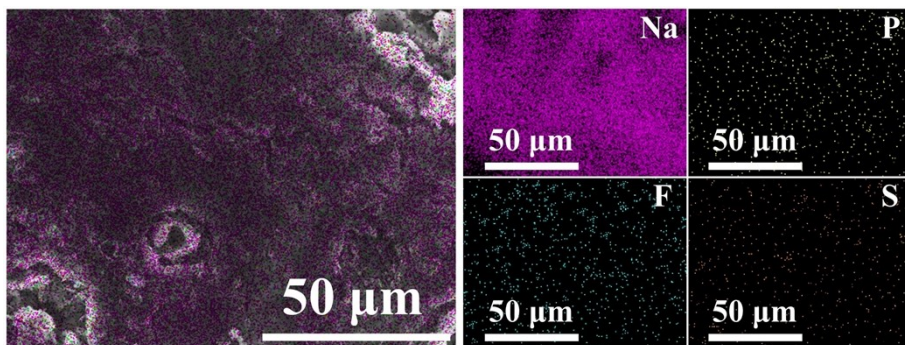

**Fig. S7.** EDS mapping of Na anode surface after 1000 cycles in Na||NVP full cells with EDF/PMS electrolyte.

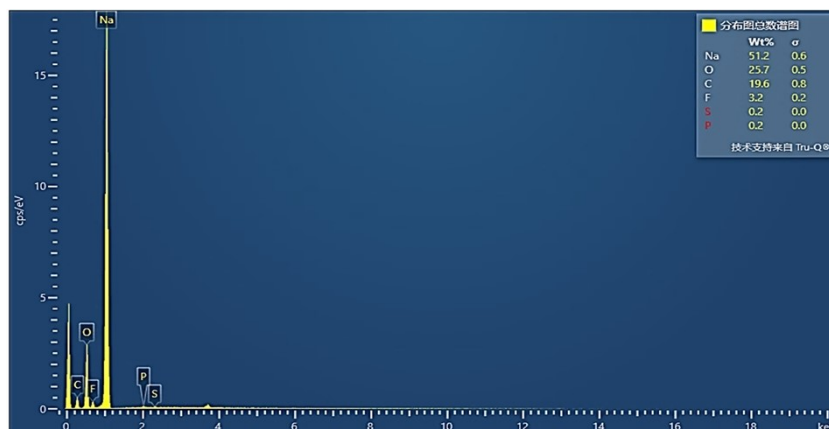

**Fig. S8.** Element content of Na anode surface after 1000 cycles in Na||NVP full cells with EDF/PMS electrolyte.

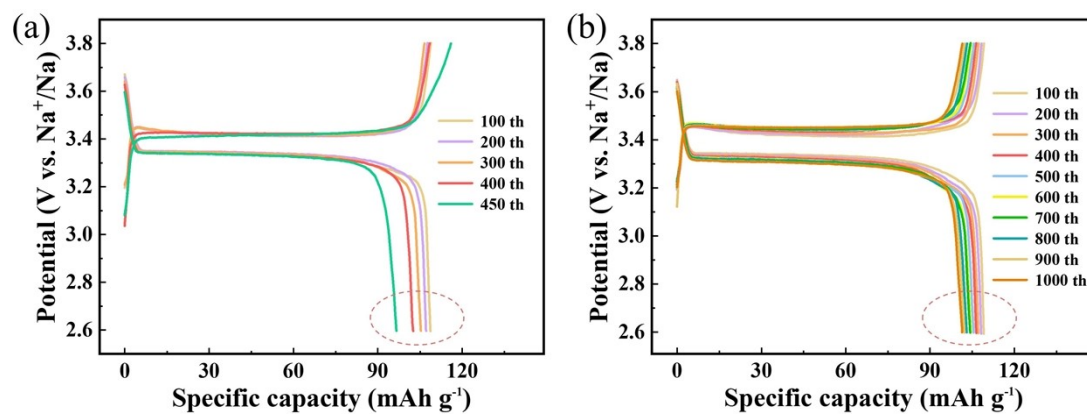

**Fig. S9.** Charge-discharge voltage curves of (a) EDF and (b) EDF/PMS at different cycles.

## References

- [1] R. Klee, M.J. Aragón, R. Alcántara, J.L. Tirado, P. Lavela, High-Performance  $\text{Na}_3\text{V}_2(\text{PO}_4)_3/\text{C}$  Cathode for Sodium-Ion Batteries Prepared by a Ball-Milling-Assisted Method, *Eur. J. Inorg. Chem.* 2016 (2016) 3212-3218.
